# Supplementary material for: Meta-Transcriptomic Analysis Uncovers the Presence of Four Novel Viruses and Multiple Known Virus Genera in a Single Hibiscus rosa-sinensis Plant in Colombia
Source: MDPI journal article supplement (doi:10.3390/v16020267), 2024-02-07
Supplement: s1 [file s1]

**Supplementary Figure S1:** Heatmap analysis of the pairwise amino acid identity matrixes of hibiscus carlaviruses (HiCaV-A, HiCaV-B, HiCaV-C, and HiCaV-D) infecting the RsTHr hibiscus sample. Collectively, 45, 40, and 35 carlavirus species Triple Gene Block (TGB) 1 (S1A), TGB2 (S1B), and TGB3 (S1C), amino acid sequences, respectively, were included from the NCBI database. Different shades of blue triangle for TGB1 to TGB3 inside the red-bordered rectangles refer to less than 55% amino acid identity of HiCaVs with any carlavirus sequences included in this analysis. Phylogenetic relationships of the hibiscus carlaviruses (HiCaV-A, HiCaV-B, HiCaV-C, and HiCaV-D) identified in the RsTHr high-throughput sequencing library with the TGB1 (S1D), TGB2 (S1E), and TGB3 (S1F) complete amino acid sequences of 35 to 45 *Betaflexiviridae* family members using the Multiple Alignment using Fast Fourier Transform (MAFFT, v7.520) program with bootstrap values of 1000 replicates. The names corresponding to the accession numbers in the heatmap analysis are displayed in the phylogenetic trees created using the TGB-1, -2, and -3 amino acid sequences.

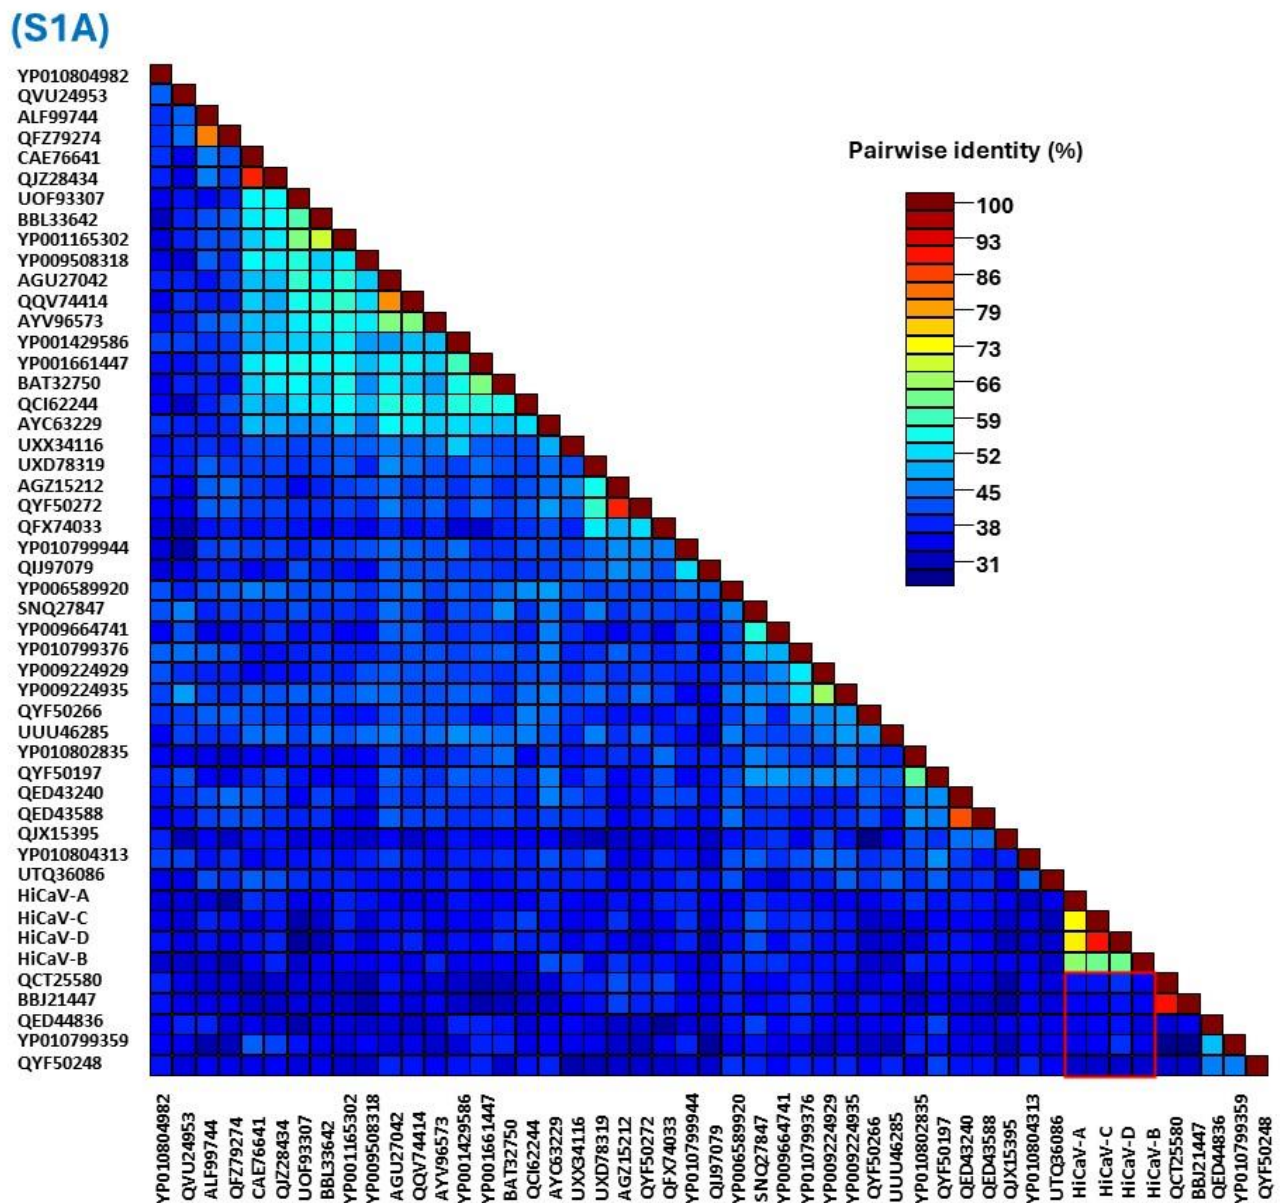

(S1B)

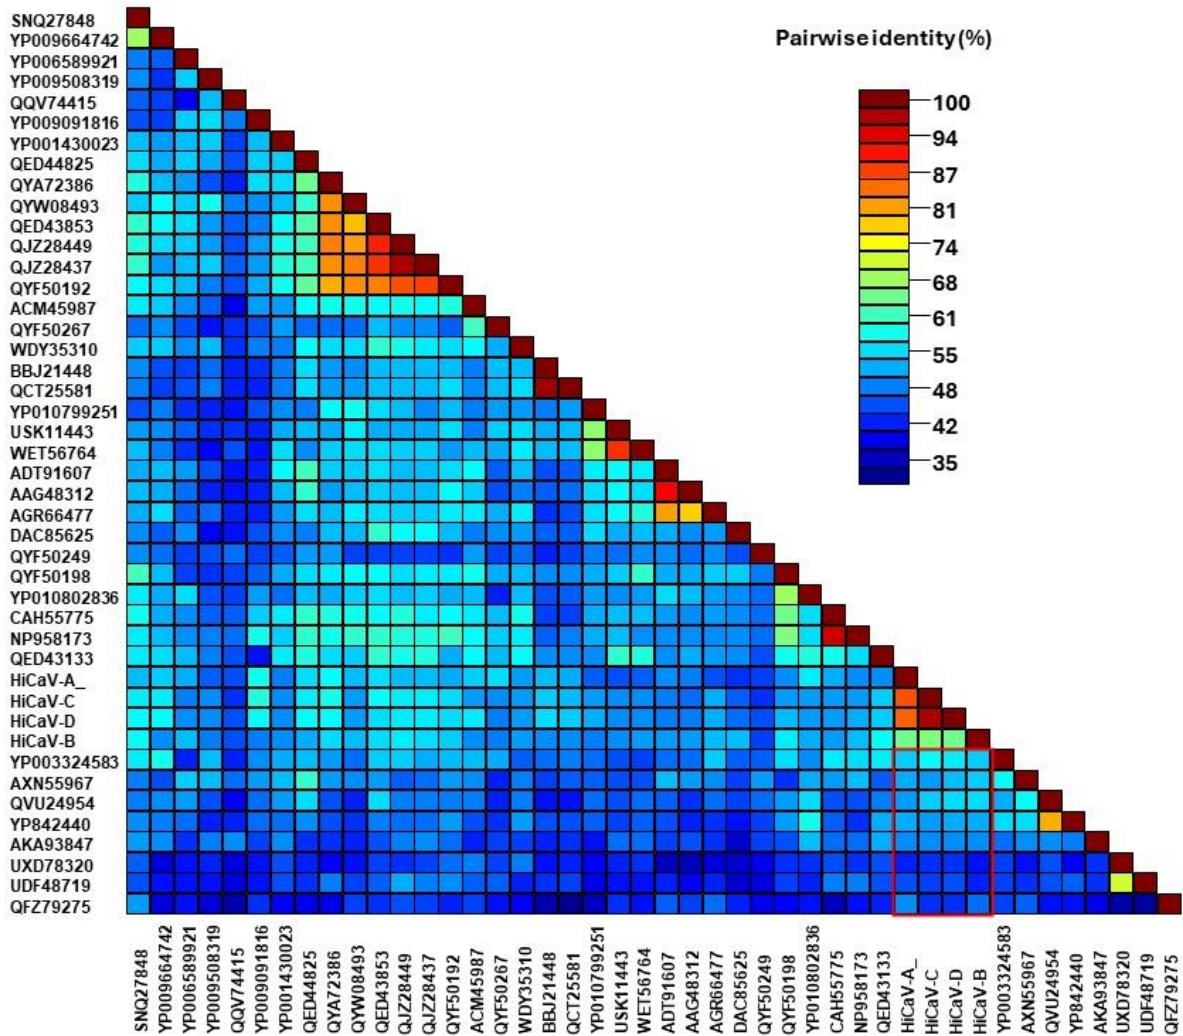

(S1C)

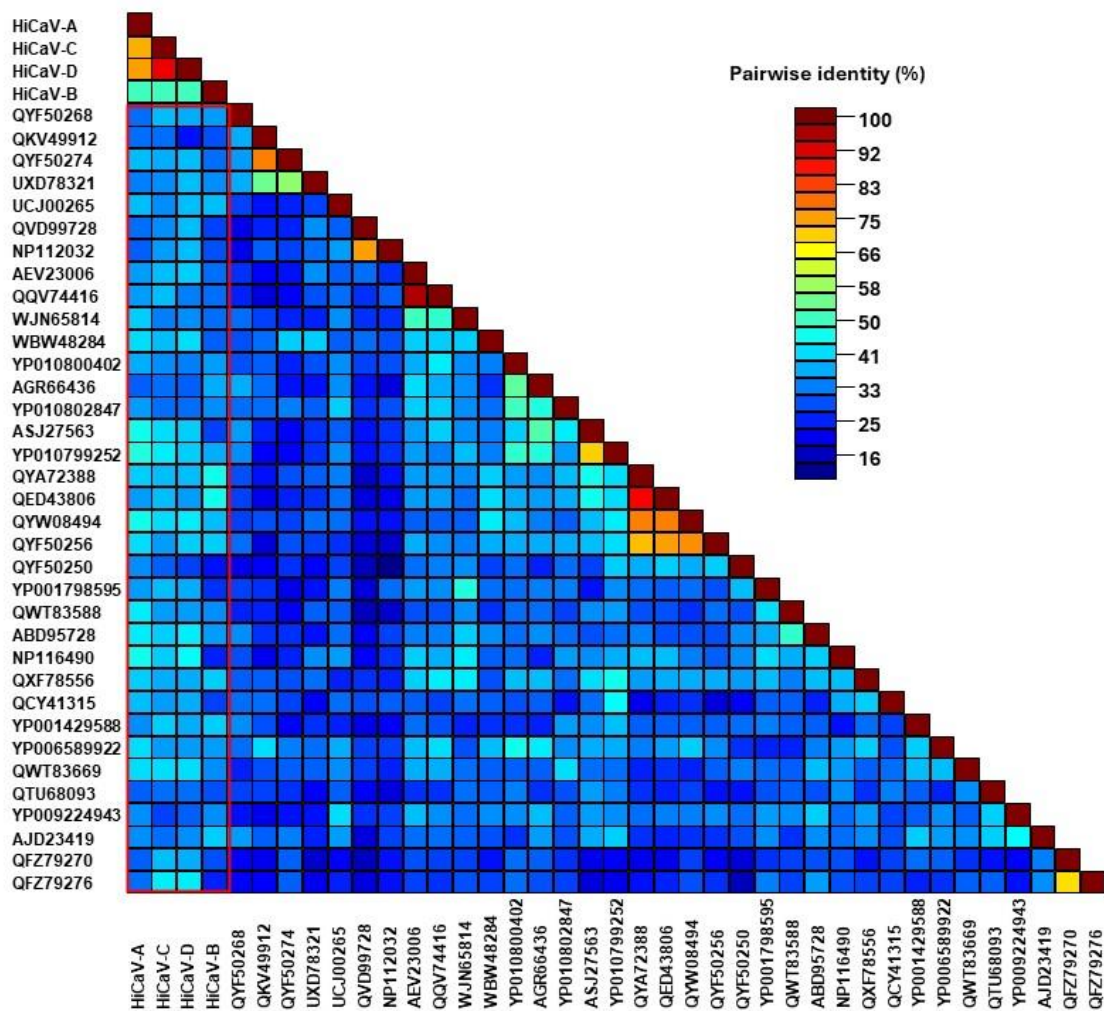

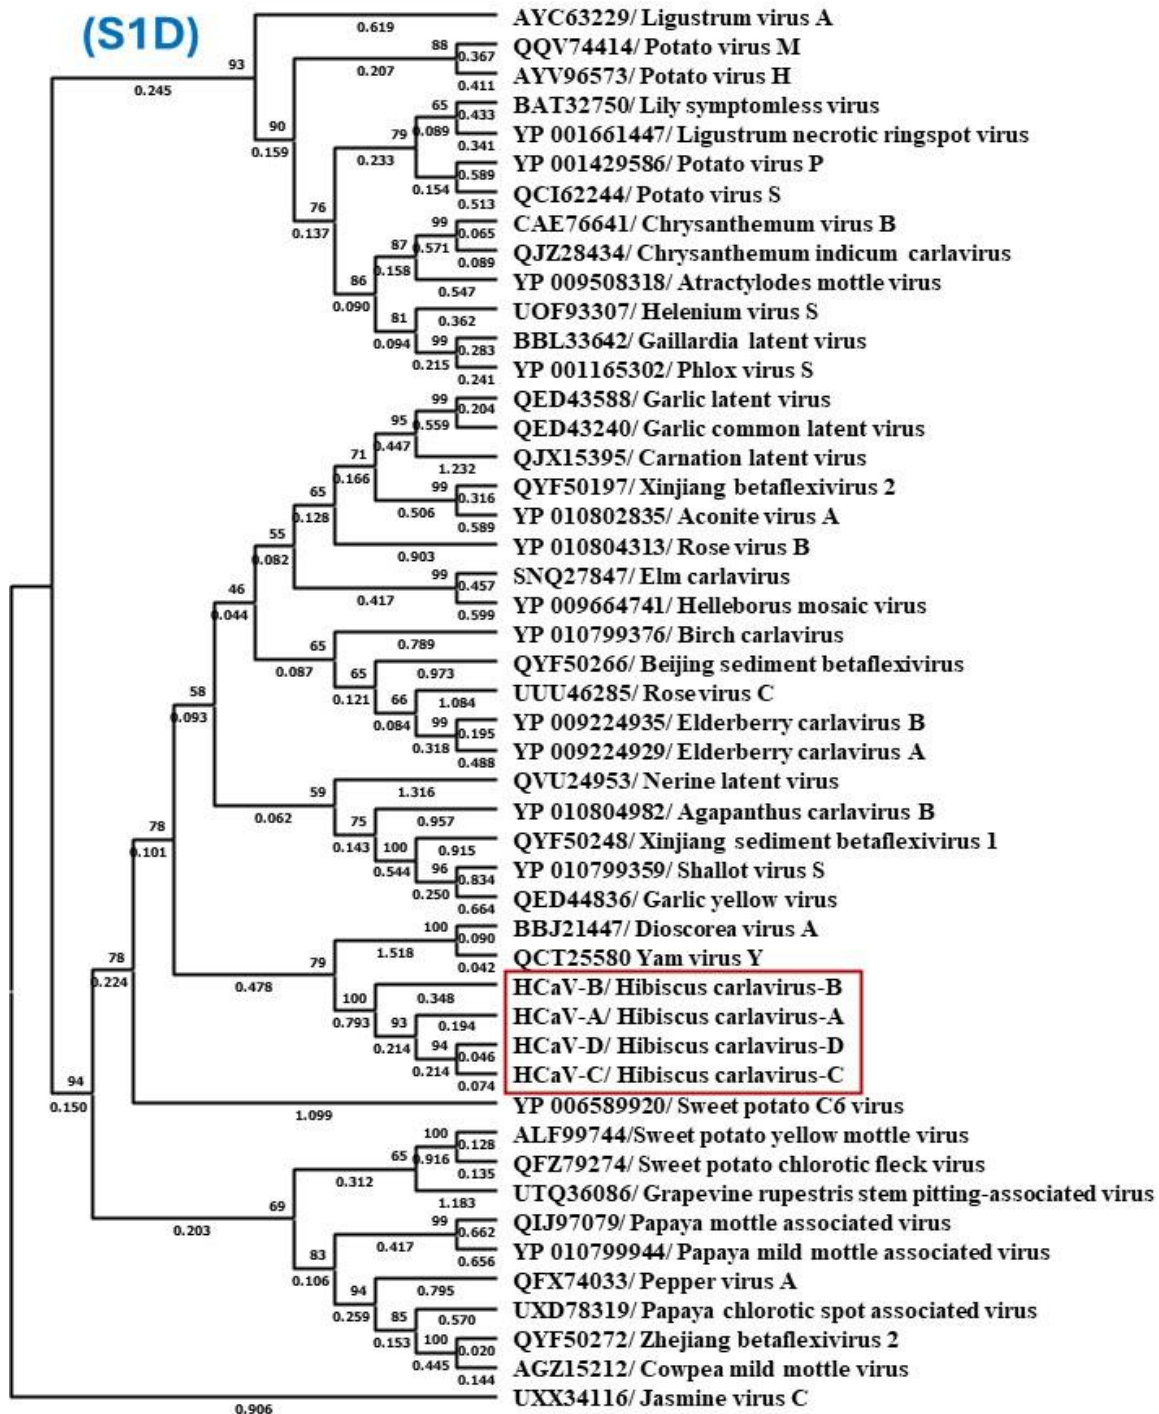

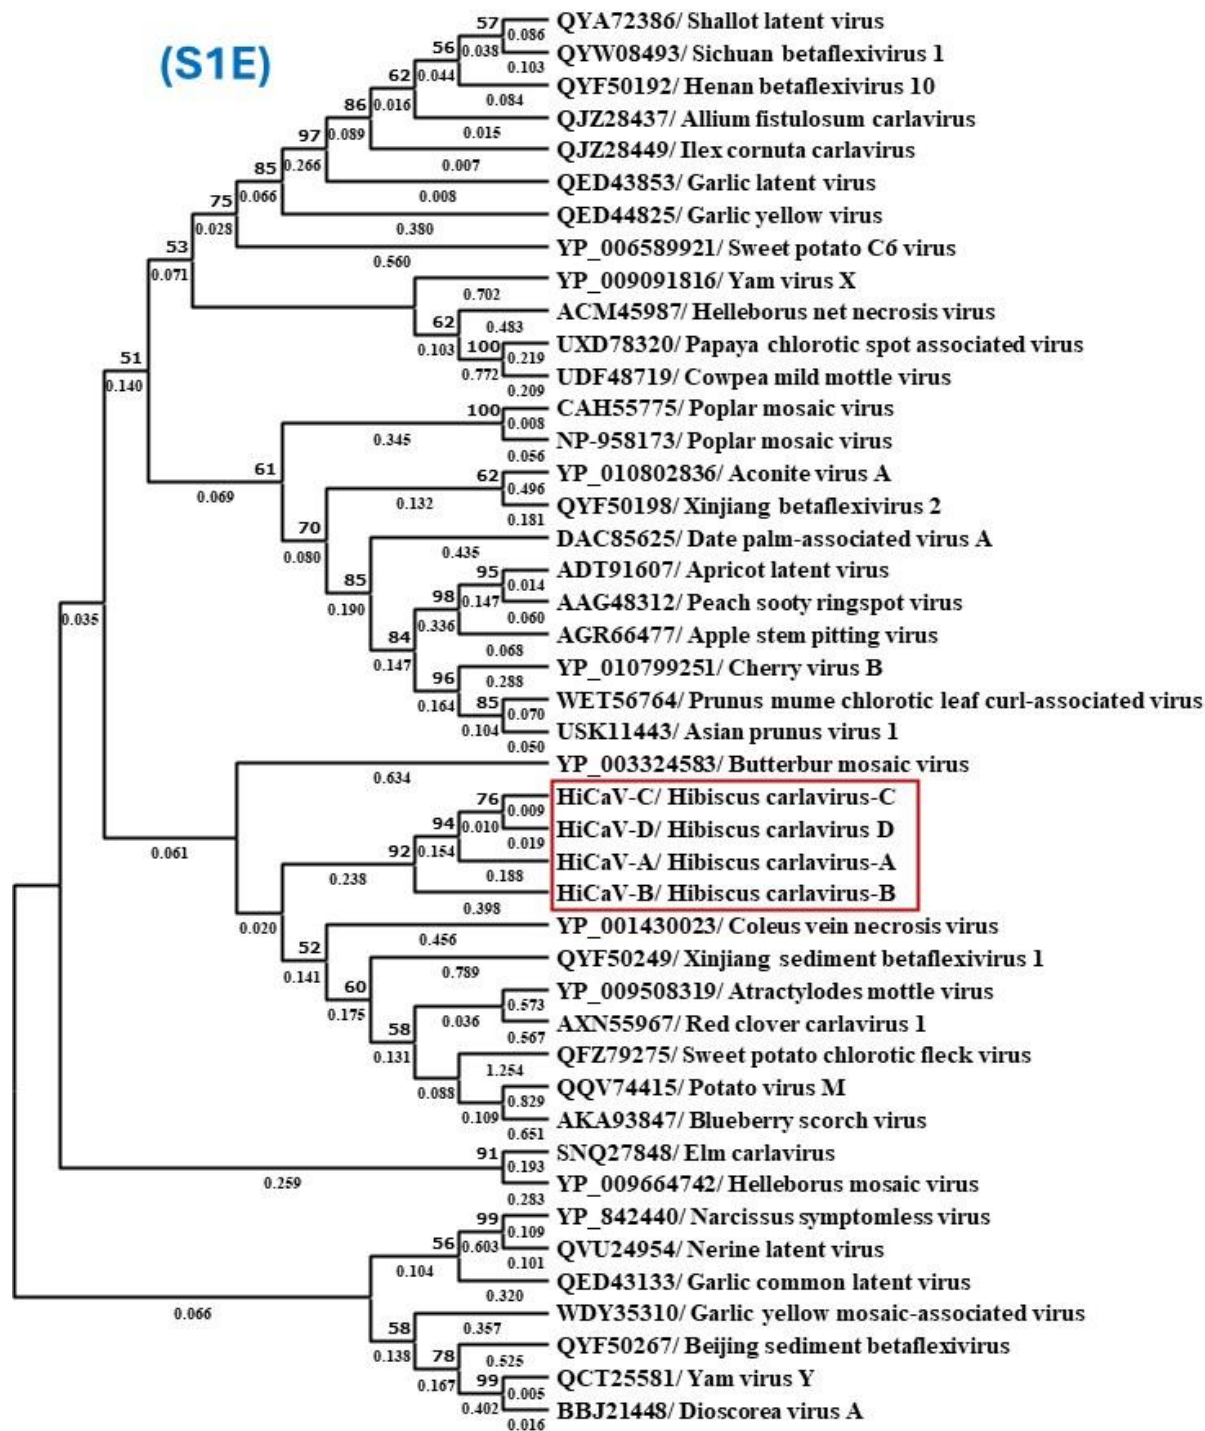

(S1F)

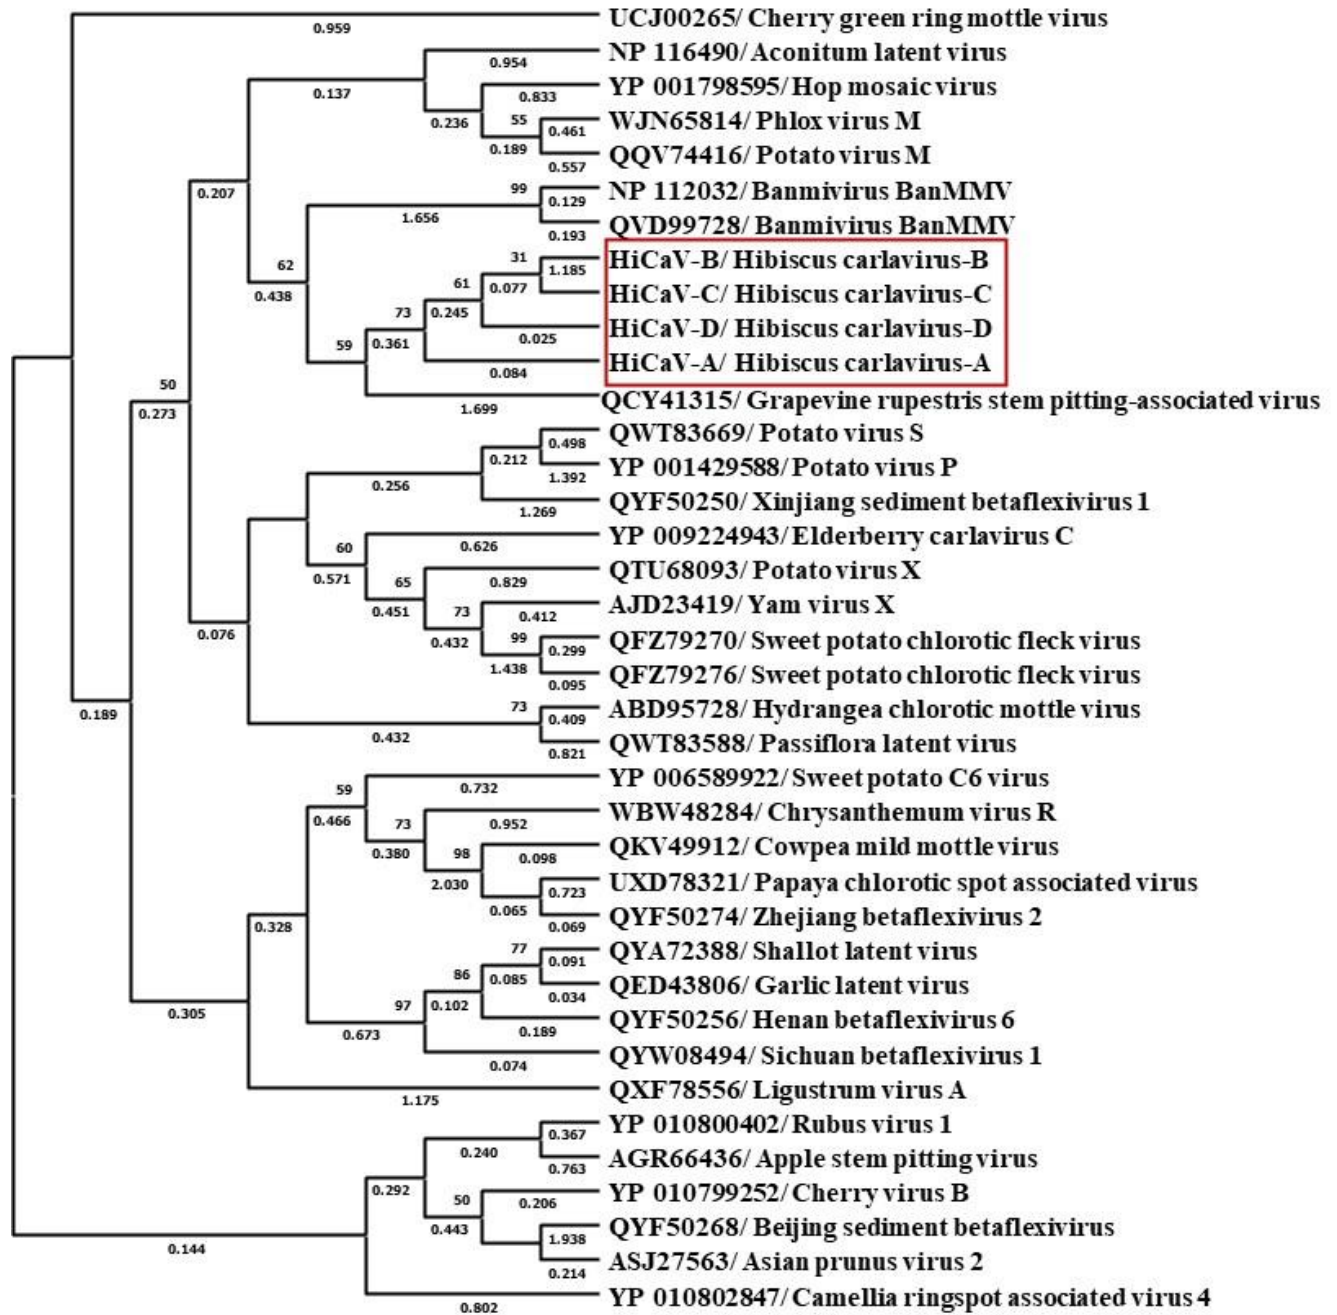

**Supplementary Figure S2:** Phylogenetic relationships of the newly discovered hibiscus potexvirus (HiVX) in the RsTHr high-throughput sequencing library with 57 potexvirus species genome sequences (at nucleotide level) using the Multiple Alignment using Fast Fourier Transform (MAFFT, v7.520) program with bootstrap values of 1000 replicates.

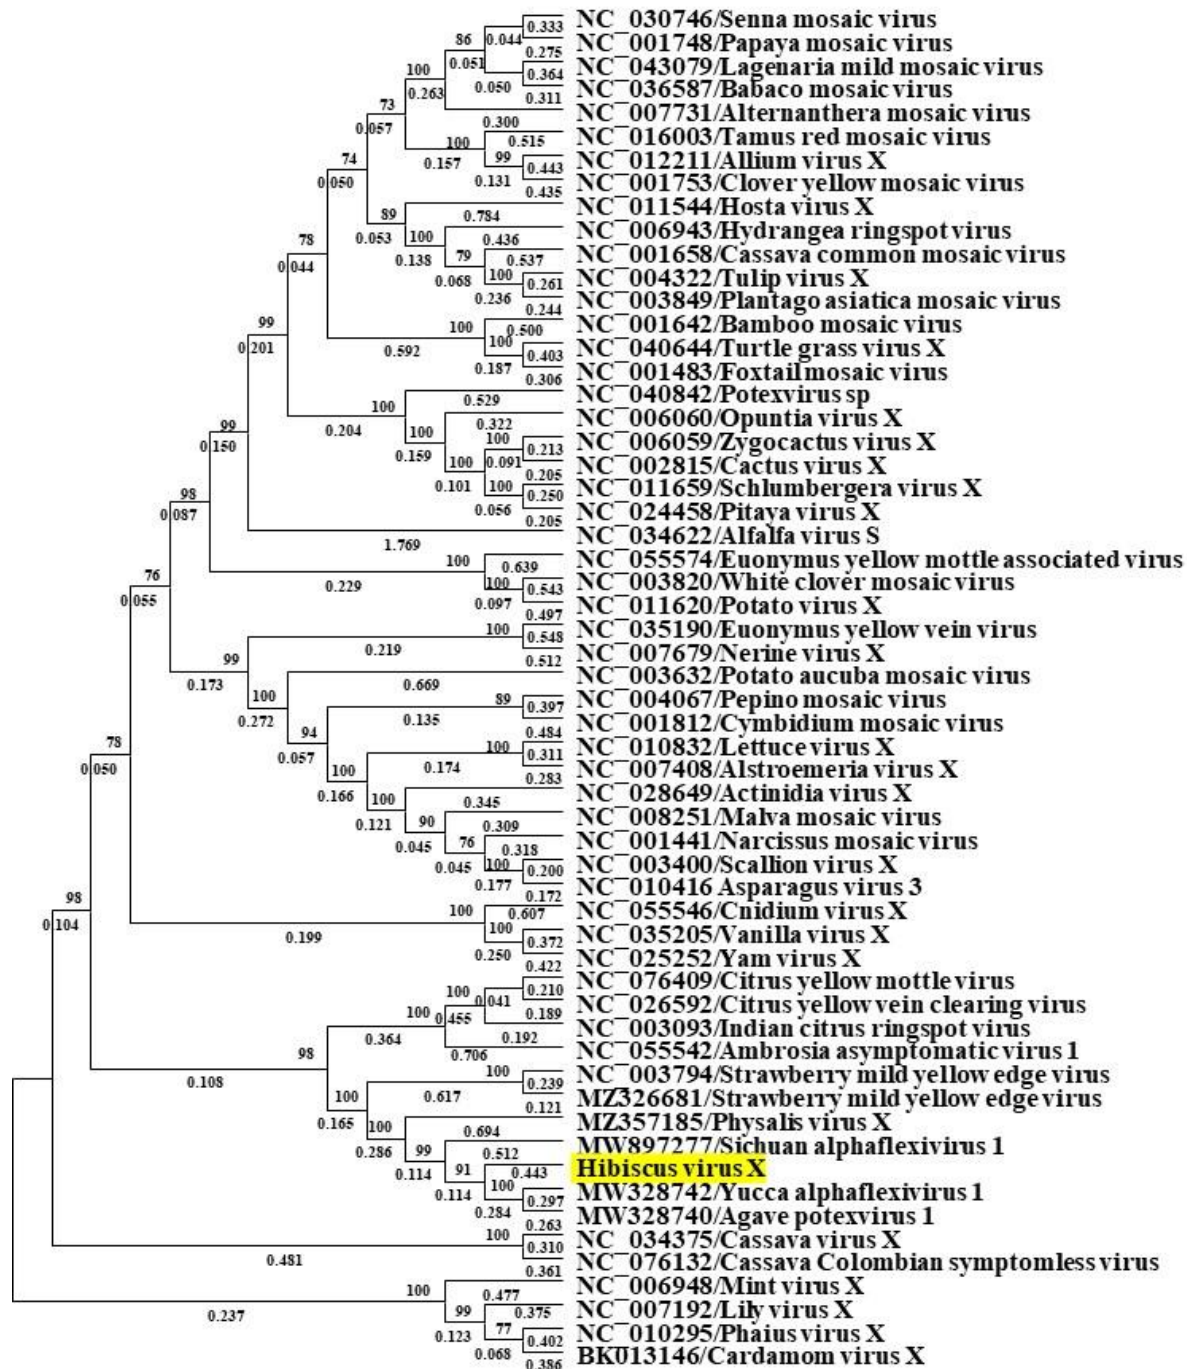

**Supplementary Figure S3:** Phylogenetic relationships of the newly discovered hibiscus potexvirus (HiVX) in the RsTHr high-throughput sequencing library with the most closely related potexvirus TGB1 (S3A), TGB2 (S3B) and TGB3 (S3C) amino acid sequences available in GenBank utilizing the Multiple Alignment using Fast Fourier Transform (MAFFT, v7.520) program with bootstrap values of 1000 replicates.

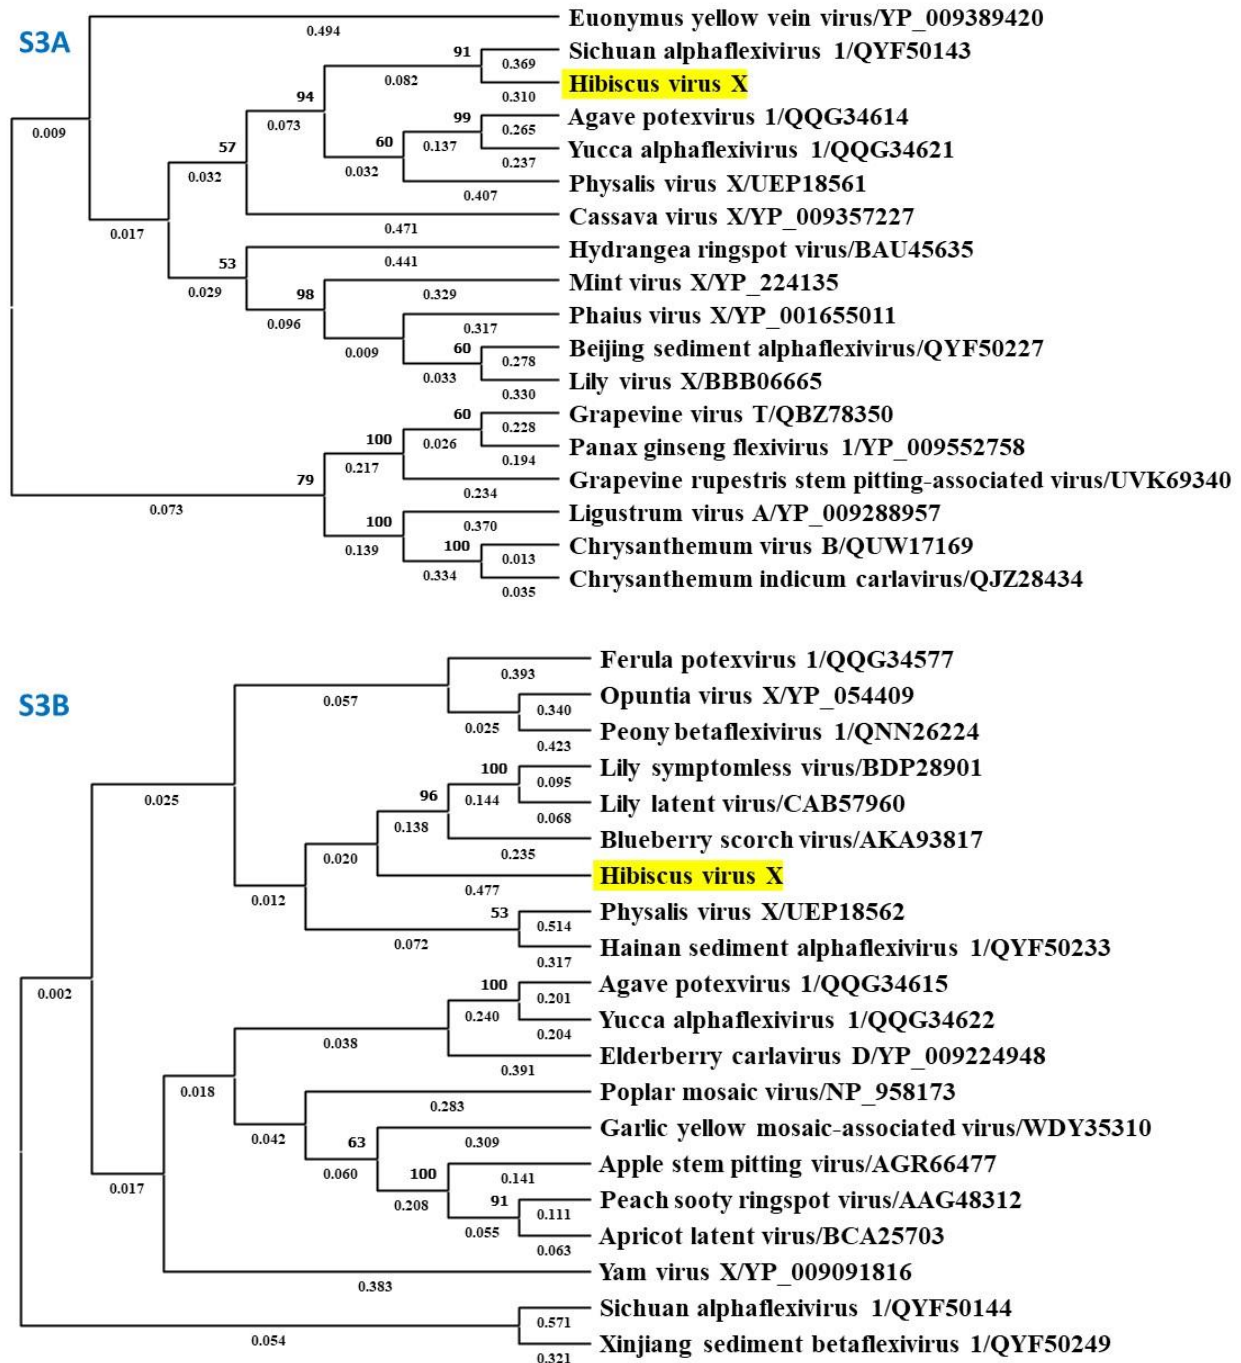

S3C

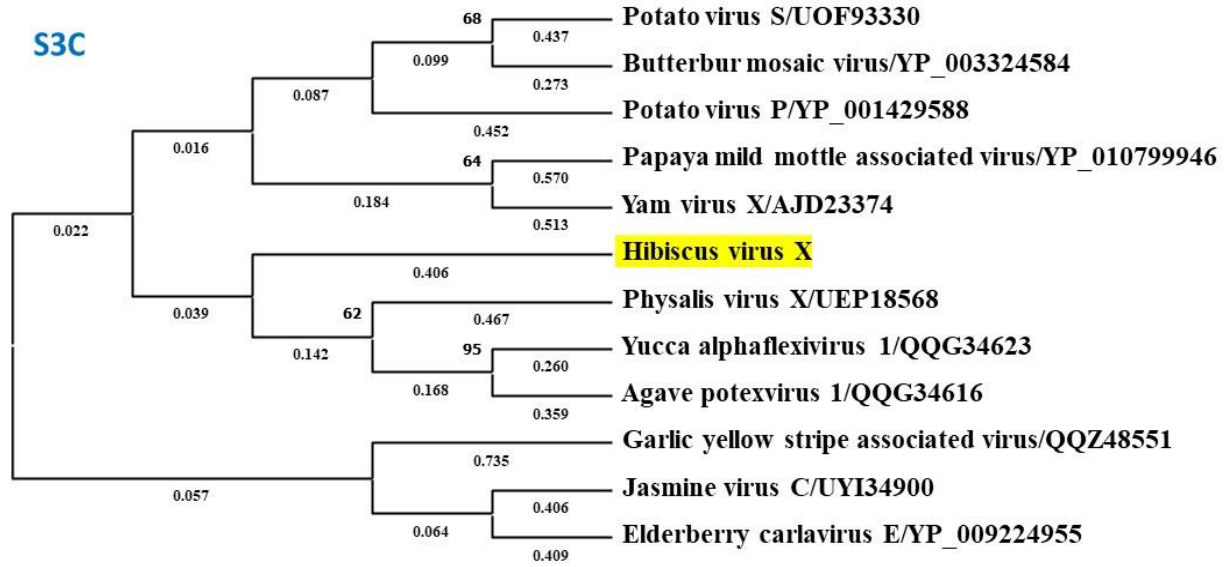

**Supplementary Figure S4:** Phylogenetic relationships of the hibiscus variant of physalis vein necrosis virus (PhyVNV) identified in the RsTHr high-throughput sequencing library with the 37 RNA1 (S4A) and 38 RNA2 (S4B) nepovirus species sequences (nucleotide level) utilizing the Multiple Alignment using Fast Fourier Transform (MAFFT, v7.520) program with bootstrap values of 1000 replicates

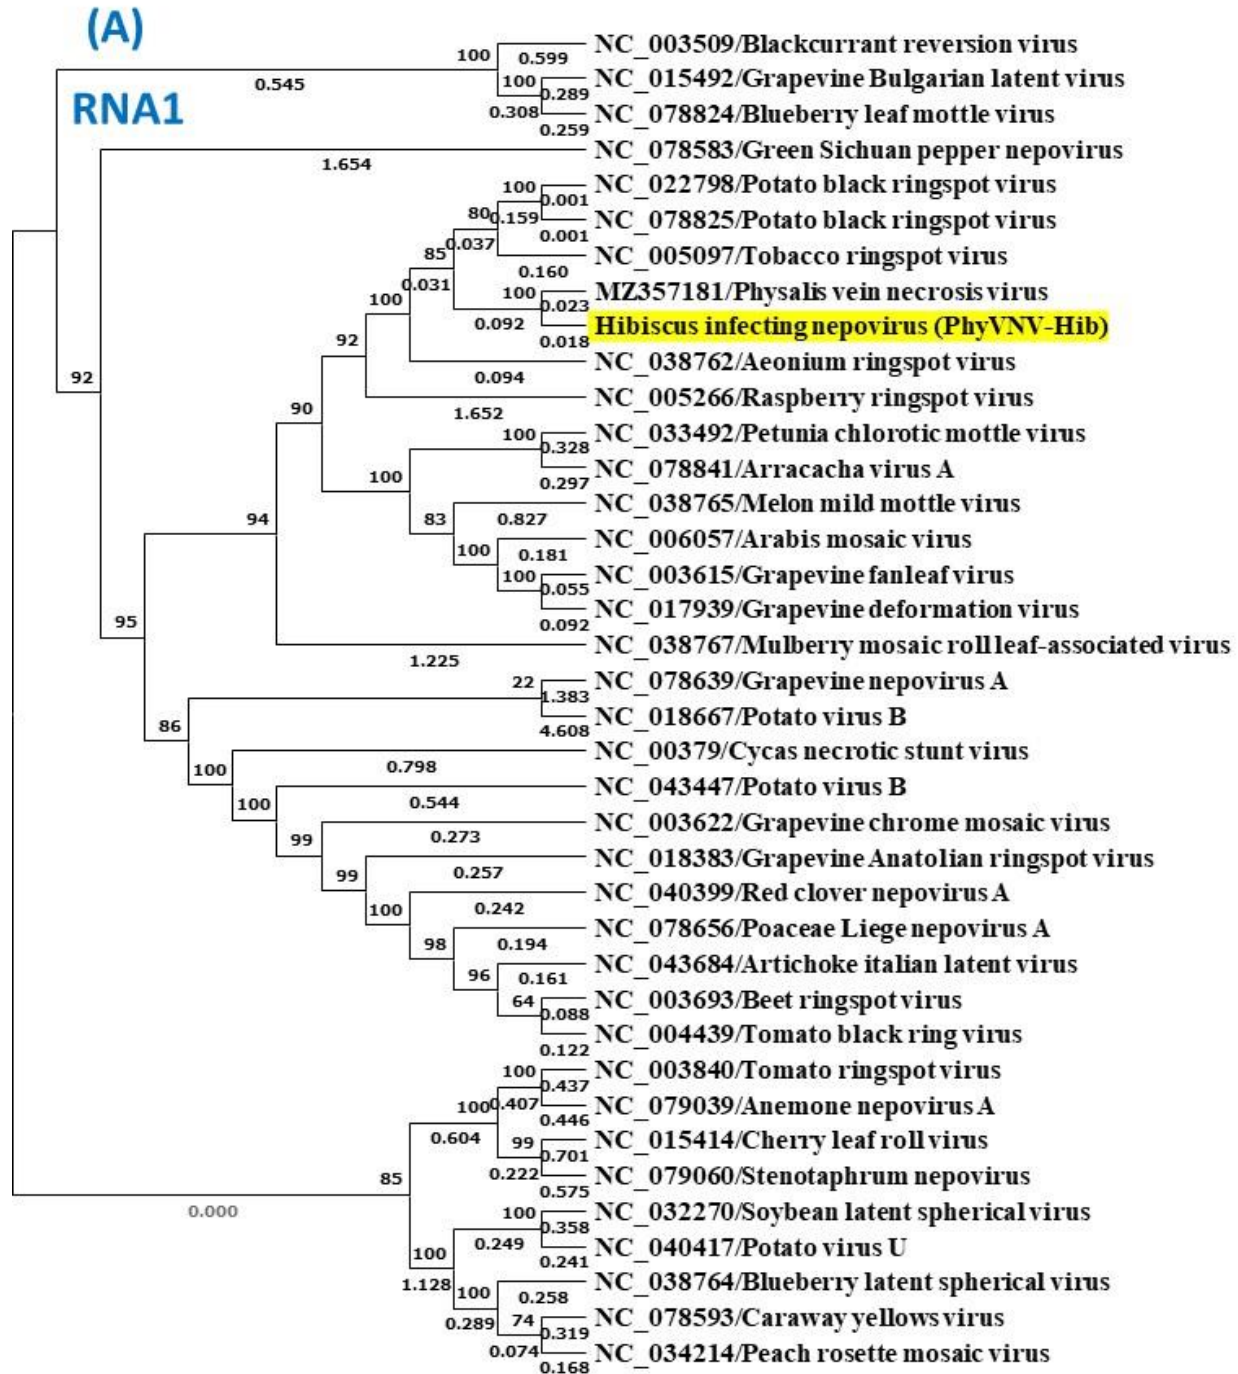

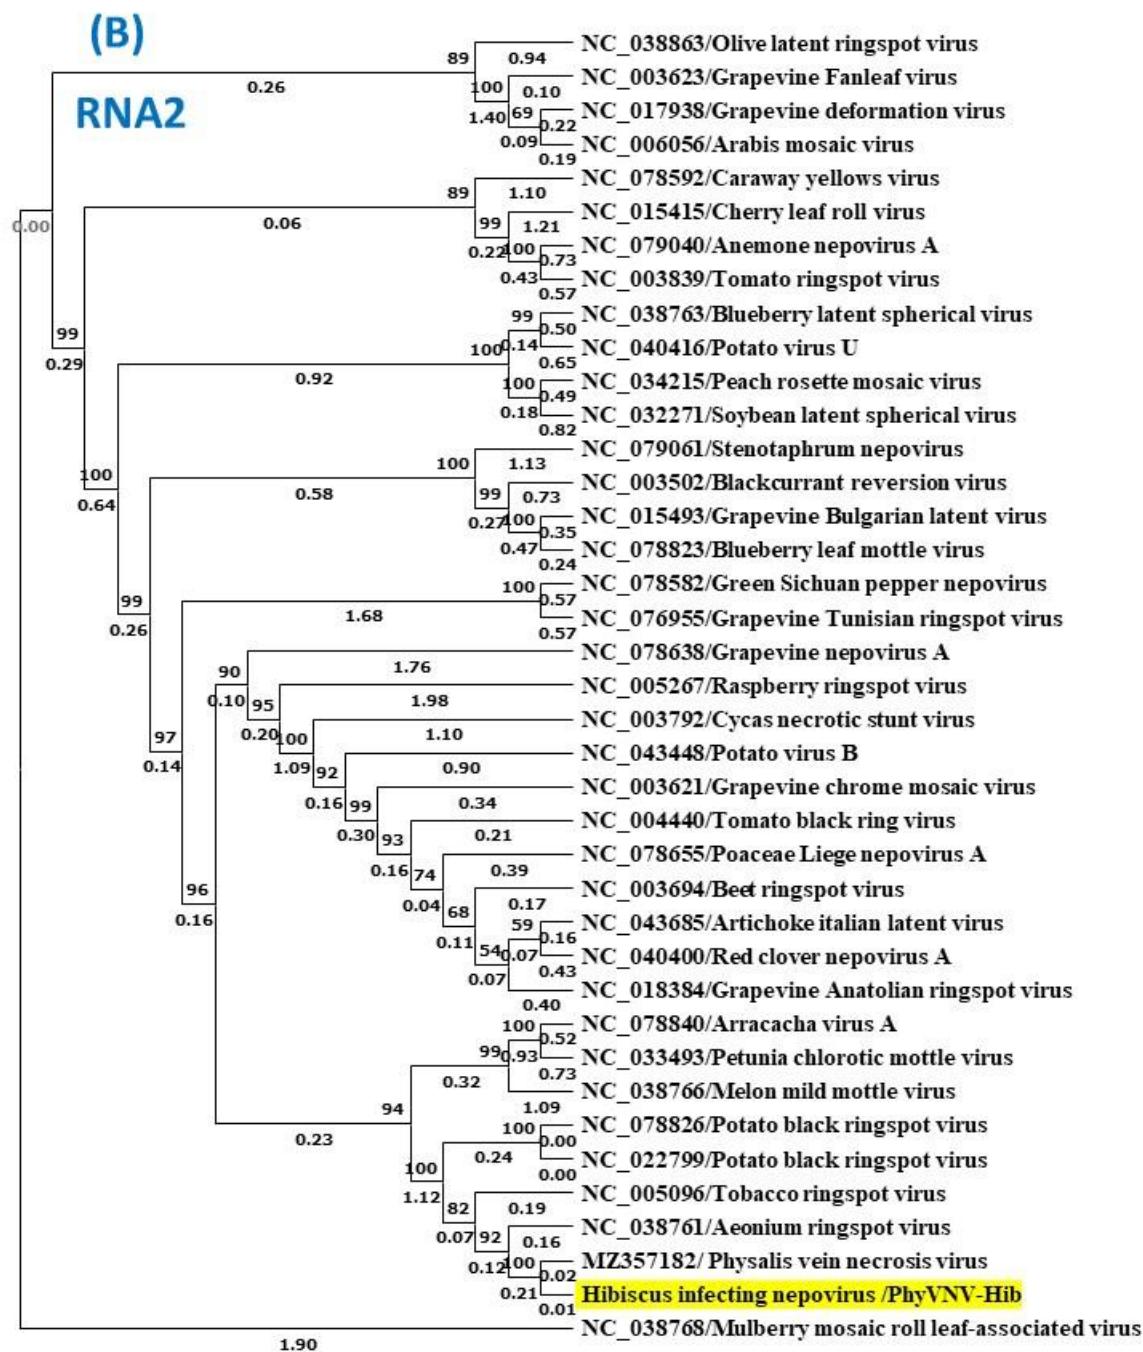

**Supplementary Table S1:** Published primer sequences of the citrus leprosis virus C2 and its hibiscus strain (CiLV-C2H), Hibiscus soymovirus (HSV) and Passion fruit green spot virus (PFGSV) are detailed with their citation.

| Virus Name                                             | Polarity  | Primers       |                                   | Amplified region      | Amplicon size (Nts) | References                      |
|--------------------------------------------------------|-----------|---------------|-----------------------------------|-----------------------|---------------------|---------------------------------|
|                                                        |           | Name          | Sequence from 5' to 3'            |                       |                     |                                 |
| Citrus leprosis virus C2 (CiLV-C2)                     | sense     | CiLV-C2-CPG-F | ATGAGTAACATTGTGTCGTTTTCTGTTGT     | Coat protein          | 795                 | Roy et al., 2013 [49]           |
|                                                        | antisense | CiLV-C2-CPG-R | TCACTCTTCTGTTCATCAACCTGTT         |                       |                     |                                 |
| Hibiscus strain of Citrus leprosis virus C2 (CiLV-C2H) | sense     | R1CiLV-C2-GF5 | TTGAAGTTAAAGTTCAGGTTCAACG         | RdRp and Coat protein | 1447                | Roy et al., 2018 [6]            |
|                                                        | antisense | R1CiLV-C2H-R5 | GGATGTTTACTCTCCCTGCTCTTCTG        |                       |                     |                                 |
| Hibiscus Soymovirus (HSV)                              | sense     | HSV-REP-F     | TAA CAG CAT TCA GTT GTC CAC CTC A | Replicase             | 631                 | Roy et al., 2023 [8]            |
|                                                        | antisense | HSV-REP-R     | TGA AGG ATT GCT CCC CAA GAA TCT T |                       |                     |                                 |
|                                                        | sense     | HSV-CPG-F     | TAG ATC ACC ATC TCC AGT ACC TCC A | Coat protein          | 401                 |                                 |
|                                                        | antisense | HSV-CPG-R     | CTG TTT CTT GAC CAG TTG TTC CCA T |                       |                     |                                 |
|                                                        | sense     | SVF1          | AGGAAGATGGTCGTTTTGGG              | Transactivation       | 430                 | Wang et al. 2023 [31]           |
|                                                        | antisense | SVR1          | ACTGGACTGCTGGTTGTATG              |                       |                     |                                 |
| Passion fruit green spot virus (PFGSV)                 | sense     | C13R          | ATTCATGCGTTTCACGGTTA              | RNA1                  | 321                 | Ramos-González et al. 2020 [48] |
|                                                        | antisense | C13F          | CGAATGCCTCTGACACAAC               |                       |                     |                                 |
|                                                        | sense     | C6F           | CGATATTGATCAATCCGTT               | RNA2                  | 244                 |                                 |
|                                                        | antisense | C6R           | CACCTTAAAATTCGAGGGTT              |                       |                     |                                 |
|                                                        | sense     | C8F           | TTCATCGCAAGTTCGTATACCT            |                       | 299                 |                                 |
|                                                        | antisense | C8R           | CTGTTGTGCCAATCATCAA               |                       |                     |                                 |

**Supplementary Table S2:** Analysis of the complete genome nucleotide sequence and the translated amino acid gene sequence of each open reading frame of the newly discovered Hibiscus carlaviruses with nine or ten nearest carlavirus relatives; percentage sequence coverage is indicated in parentheses. NB. Some of the related viruses listed in the table have multiple sequences in GenBank, thus the sequence accession numbers with the highest amino acid sequence identity for different HiCaV proteins may represent distinct isolates of the same virus. NS = not significant.

| Hibiscus Carlavirus              | Nucleotide identity        |                                 |                         |                                    |                                     |                                        |                                    |                     |                               |                   |
|----------------------------------|----------------------------|---------------------------------|-------------------------|------------------------------------|-------------------------------------|----------------------------------------|------------------------------------|---------------------|-------------------------------|-------------------|
| Full genome of HiCaVs            | NC_018448                  | MW897314                        | LT898349                | MW897296                           | MW371117                            | MZ173553                               | MK778784                           | MN059240            | NC_077068                     | OM671312          |
|                                  | Sweet potato virus C6      | Beijing sediment betaflexivirus | Elm carlavirus          | Xinjiang sediment betaflexivirus 1 | Cowpea mild mottle virus (MW201798) | Papaya chlorotic spot associated virus | Sweet potato chlorotic fleck virus | Garlic latent virus | Rose virus B                  | Ligustrum virus A |
| Hibiscus carlavirus A (8229 nt)  | 68.70 (20)                 | 67.37 (20)                      | 66.67(18)               | 70.06 (16)                         | 69.33 (15)                          | 69.44 (15)                             | 71.98 (10)                         | 66.26 (14)          | 67.70 (19)                    | 68.40 (15)        |
| Hibiscus carlavirus B (8202)     | 68.77 (22)                 | 67.67 (18)                      | 66.73 (17)              | 70.42 (11)                         | 71.22 (15)                          | 70.79 (13)                             | 67.62 (18)                         | 67.11 (18)          | 70.86 (12)                    | 67.43 (18)        |
| Hibiscus carlavirus C (8117nt)   | 68.01 (22)                 | 68.28 (18)                      | 66.72 (17)              | 68.59 (16)                         | 69.85 (22)                          | 68.41 (20)                             | 69.18 (18)                         | 68.29 (15)          | 66.90 (26)                    | 69.57 (13)        |
| HiCaV-D (Contig 836 nt)          | 64.16 (45)                 | 68.80 (14)                      | NS                      | 72.34 (22)                         | 70.87 (35)                          | 71.52 (28)                             | 73.54 (26)                         | 72.31 (20)          | 71.49 (70)                    | 73.31 (70)        |
| HiCaV-D (Contig 3009 nt)         | 100 (01)                   | NS                              | 69.53 (04)              | NS                                 | 73.85 (02)                          | NS                                     | 74.79 (03)                         | 68.27 (03)          | 77.55 (01)                    | 82.86 (03)        |
| HiCaV-D (Contig 641 nt)          | 68.75 (92)                 | 67.83 (997)                     | 67.96 (56)              | 71.08 (88)                         | 66.50 (92)                          | 68.75 (56)                             | 67.62 (92)                         | 66.24 (84)          | 70.15 (68)                    | 68.65 (57)        |
| HiCaV-D (Contig 1899 nt)         | 69.66 (9)                  | 75.44 (03)                      | NS                      | 71.24 (08)                         | 72.29 (12)                          | NS                                     | 70.92 (07)                         | 69.30 (16)          | 70.59 (05)                    | 65.35 (14)        |
| HiCaVs-ORF encoding gene         | Amino Acid identity        |                                 |                         |                                    |                                     |                                        |                                    |                     |                               |                   |
| RdRp protein of HiCaVs           | YP_006589919               | BAL03071.1                      | YP_009224952.1          | WCC72446.1                         | WCR76308.1                          | SNQ27851.1                             | WBG54312.1                         | WAK43334.1          | QXQ32728.1                    |                   |
|                                  | Sweet potato virus C6      | Helleborus net necrosis virus   | Elderberry carlavirus E | Rose virus B                       | American hop latent virus           | Elm carlavirus                         | Poplar mosaic virus                | Ligustrum virus A   | Helenium virus S              |                   |
| HiCaV-A                          | 52.83 (81)                 | 52.24 (79)                      | 49.08 (79)              | 48.46 (80)                         | 42.81 (99)                          | 50.14 (75)                             | 43.62 (99)                         | 51.46 (78)          | 41.18 (99)                    |                   |
| HiCaV-B                          | 45.12 (100)                | 44.48 (99)                      | 51.24 (79)              | 51.15 (78)                         | 49.02 (80)                          | 50.45 (79)                             | 50.00 (80)                         | 50.96 (78)          | 48.81 (79)                    |                   |
| HiCaV-C                          | 51.62 (83)                 | 51.65 (80)                      | 43.47 (100)             | 49.33 (78)                         | 42.19 (99)                          | 50.00 (76)                             | 43.94 (99)                         | 49.82 (80)          | 41.04 (99)                    |                   |
| HiCaV-D (836 nt)                 | 53.82 (98)                 | 55.47 (98)                      | 57.95 (58)              | 56.88 (99)                         | 52.33 (98)                          | 57.87 (90)                             | 55.07 (99)                         | 56.00 (98)          | 51.27 (98)                    |                   |
| HiCaV-D (3009 nt)                | 40.99 (59)                 | 38.64 (59)                      | 35.79 (62)              | 39.82 (44)                         | 36.67 (60)                          | 36.48 (63)                             | 37.94 (62)                         | 35.34 (61)          | 34.69 (61)                    |                   |
| HiCaV-D (641 nt)                 | 69.95 (99)                 | 72.77 (99)                      | 66.20 (99)              | 64.79 (99)                         | 65.26 (99)                          | 67.61 (99)                             | 69.95 (99)                         | 65.73 (99)          | 66.20 (99)                    |                   |
| Coat protein of HiCaVs           | YP_006589923               | ACM45995.1                      | YP_009224950.1          | YP_009224938.1                     | YP_009224932.1                      | YP_010802838.1                         | YP_003324585.1                     | WBG54313.1          | QED43237.1                    |                   |
|                                  | Sweet potato virus C6      | Helleborus net necrosis virus   | Elderberry carlavirus D | Elderberry carlavirus B            | Elderberry carlavirus A             | Aconite virus A                        | Butterbur mosaic virus             | Poplar mosaic virus | Garlic common latent virus    |                   |
| HiCaV-A                          | 48.64 (93)                 | 50.17 (89)                      | 49.80 (79)              | 48.76 (78)                         | 48.39 (80)                          | 44.98 (93)                             | 49.03 (84)                         | 42.72 (98)          | 44.74 (86)                    |                   |
| HiCaV-B                          | 52.14 (82)                 | 50.52 (91)                      | 49.39 (78)              | 47.76 (78)                         | 46.77 (79)                          | 46.69 (95)                             | 49.23 (85)                         | 48.57 (78)          | 47.64 (81)                    |                   |
| HiCaV-C                          | 46.84 (96)                 | 47.39 (99)                      | 50.20 (79)              | 48.76 (78)                         | 47.98 (80)                          | 50.21 (78)                             | 47.97 (87)                         | 43.56 (98)          | 48.96 (78)                    |                   |
| HiCaV-D (last 444 nt of 1899 nt) | 33.33 (68)                 | 40.40 (66)                      | 36.67 (60)              | 35.63 (58)                         | 33.33 (62)                          | No similarity                          | 37.96 (72)                         | 31.29 (99)          | 42.53 (58)                    |                   |
| TGB1 protein of HiCaVs           | QED43240.1                 | QED43588.1                      | SNQ27852.1              | UZP17216.1                         | UDF48730.1                          | YP_010799376.1                         | YP_009224929.1                     | WMN13755.1          | BAT32750                      |                   |
|                                  | Garlic common latent virus | Garlic latent virus             | Elm carlavirus          | Chrysanthemum virus B              | Cowpea mild mottle virus            | Birch carlavirus                       | Elderberry carlavirus A            | Aconite virus A     | Lily symptomless virus        |                   |
| HiCaV-A                          | 37.93 (100)                | 37.99 (99)                      | 38.82 (100)             | 38.98 (100)                        | 36.91 (98)                          | 37.45 (99)                             | 36.48 (100)                        | 41.10 (100)         | 34.32 (100)                   |                   |
| HiCaV-B                          | 36.36 (100)                | 36.80 (100)                     | 38.82 (100)             | 36.64 (100)                        | 35.62 (98)                          | 37.91 (88)                             | 35.19 (100)                        | 38.03 (100)         | 37.02 (100)                   |                   |
| HiCaV-C                          | 38.96 (100)                | 35.93 (100)                     | 40.08 (100)             | 36.97 (100)                        | 37.55 (98)                          | 38.14 (99)                             | 37.71 (100)                        | 37.92 (100)         | 37.61 (100)                   |                   |
| HiCaV-D                          | 36.36 (100)                | 35.50 (100)                     | 41.77 (100)             | 36.32 (100)                        | 37.55 (98)                          | 37.61 (88)                             | 36.02 (100)                        | 36.29 (100)         | 37.18 (100)                   |                   |
| TGB2 protein of HiCaVs           | CAA92817.1                 | QED43133.1                      | BAZ96205.1              | YP_003324583.1                     | YP_009664742.1                      | YP_006589921                           | AGR66477.1                         | SNQ27848.1          | ACM45987.1                    |                   |
|                                  | Garlic latent virus        | Garlic common latent virus      | Shallot latent virus    | Butterbur mosaic virus             | Helleborus mosaic virus             | Sweet potato virus C6                  | Apple stem pitting virus           | Elm carlavirus      | Helleborus net necrosis virus |                   |
| HiCaV-A                          | 55.45 (100)                | 49.53 (100)                     | 53.64 (100)             | 55.14 (100)                        | 52.25 (100)                         | 53.92 (95)                             | 44.34 (96)                         | 50.91 (100)         | 52.34 (95)                    |                   |
| HiCaV-B                          | 53.64 (100)                | 55.05 (100)                     | 58.18 (100)             | 50.93 (100)                        | 49.09 (100)                         | 53.47 (94)                             | 51.89 (96)                         | 57.73 (89)          | 53.41 (82)                    |                   |
| HiCaV-C                          | 56.88 (100)                | 51.85 (100)                     | 55.05 (100)             | 55.14 (100)                        | 53.64 (100)                         | 49.02 (95)                             | 49.53 (96)                         | 57.00 (92)          | 56.70 (88)                    |                   |
| HiCaV-D                          | 55.05 (100)                | 50.93 (100)                     | 53.21 (100)             | 54.21 (100)                        | 54.55 (100)                         | 50.00 (95)                             | 49.53 (96)                         | 59.00 (92)          | 56.70 (88)                    |                   |
| TGB3 protein of HiCaVs           | CAC83689.1                 | UCJ00265.1                      | QVD99728.1              | QWT83588.1                         | ABD95728.1                          | QWT83669.1                             | YP_001429588.1                     | QTW21092.1          | AAB81271.1                    |                   |
|                                  | Garlic latent virus        | Cherry green ring mottle virus  | Banmivirus BanMMV       | Passiflora latent virus            | Hydrangea chlorotic mottle virus    | Potato virus S                         | Potato virus P                     | Potato virus X      | Potato virus M                |                   |
| HiCaV-A                          | 35.48 (93)                 | 36.84 (86)                      | 32.26 (93)              | 40.62 (93)                         | 40.62 (93)                          | 42.37 (89)                             | 48.57 (53)                         | 30.16 (95)          | 54.84 (56)                    |                   |
| HiCaV-B                          | 45.59 (94)                 | 38.81 (98)                      | 30.88 (95)              | 32.76 (85)                         | 42.86 (51)                          | 40.38 (72)                             | 38.81 (98)                         | 42.59 (77)          | 33.33 (83)                    |                   |
| HiCaV-C                          | 39.68 (98)                 | 35.43 (95)                      | 38.71 (93)              | 33.85 (100)                        | 39.68 (98)                          | 38.71 (96)                             | 39.06 (100)                        | 40.00 (92)          | 37.93 (90)                    |                   |
| HiCaV-D                          | 40.32 (96)                 | 35.70 (95)                      | 39.39 (96)              | 34.92 (96)                         | 40.62 (96)                          | 38.71 (96)                             | 48.57 (54)                         | 40.35 (89)          | 58.06 (48)                    |                   |

**Supplementary Table S3:** Nucleotide and amino acid % identities and sequence coverage (in parentheses) of each ORF of the newly discovered hibiscus virus X with the seven nearest alphaflexivirus relatives and lily symptomless carlavirus. NB: TGB3 and CPG sequences for Sichuan alphaflexivirus 1 are not available in GenBank. Open reading frame numbers with nucleotide positions in the HiVX genome and the name of the gene representing each ORF with their lengths (number of amino acids) are shown. NS = not significant; ND = not determined, as these sequences are not available.

| Hibiscus Potexvirus    | Nucleotide identity                    |                                  |                                |                          |                                          |                                          |                                                 |                                      |
|------------------------|----------------------------------------|----------------------------------|--------------------------------|--------------------------|------------------------------------------|------------------------------------------|-------------------------------------------------|--------------------------------------|
| HiVX                   | Yucca alpha-flexivirus 1 (MW328742)    | Agave potexvirus 1 (MW328740)    | Physalis virus X (MZ357185)    | Yam virus X (NC_025252)  | Sichuan alpha-flexivirus 1 (MW897277)    | Clover yellow mosaic virus (OK558678)    | Strawberry mild yellow edge virus (MZ326676)    | Lily symptom -less virus (LC720794)  |
| ORF1 (94-4170)         | 65.80 (42)                             | 65.06 (55)                       | 68.44 (16)                     | 70.36 (16)               | 66.53 (48)                               | 68.29 (21)                               | 64.85 (38)                                      | NS                                   |
| ORF2 (4205-4870)       | NS                                     | NS                               | NS                             | 84.38 (4)                | NS                                       | NS                                       | NS                                              | NS                                   |
| ORF3 (4860-5252)       | NS                                     | NS                               | NS                             | NS                       | NS                                       | NS                                       | NS                                              | 73.68 (24)                           |
| ORF4 (5122-5316)       | NS                                     | NS                               | NS                             | NS                       | ND                                       | NS                                       | NS                                              | NS                                   |
| ORF5 (5355-6275)       | 66.01 (32)                             | 69.59 (18)                       | NS                             | 67.61 (15)               | ND                                       | 60.08 (19)                               | NS                                              | NS                                   |
| Full Genome            | 65.80 (31)                             | 65.06 (38)                       | 68.44 (10)                     | 70.36 (12)               | 66.53 (30)                               | 68.29 (12)                               | 64.85 (24)                                      | 73.68 (1)                            |
| HiVX-ORF encoding gene | Amino Acid identity                    |                                  |                                |                          |                                          |                                          |                                                 |                                      |
|                        | Yucca alpha-flexivirus 1 (QQG34620-24) | Agave potexvirus 1 (QQG34613-17) | Physalis virus X (UEP18564-68) | Yam virus X (AJD3371-75) | Sichuan alpha-flexivirus 1 (QYF50142-44) | Clover yellow mosaic virus (UZP17132-36) | Strawberry mild yellow edge virus (UVT84557-61) | Lily symptomless virus (BAT32749-52) |
| RdRp(1358)             | 55.10 (95)                             | 54.26 (96)                       | 49.27 (99)                     | 49.77 (95)               | 58.51 (95)                               | 50.36 (90)                               | 48.20 (94)                                      | 23.36 (77)                           |
| TGB1 (221)             | 44.20 (100)                            | 45.29 (100)                      | 39.01 (98)                     | 34.21 (99)               | 50.45 (99)                               | 35.40 (99)                               | 35.14 (97)                                      | 31.88 (100)                          |
| TGB2 (130)             | 41.67 (100)                            | 41.22 (100)                      | 35.66 (98)                     | 47.96 (73)               | 53.23 (47)                               | 42.00 (73)                               | 45.26 (70)                                      | 47.37 (70)                           |
| TGB3 (64)              | 47.37 (87)                             | 38.18 (85)                       | 43.64 (85)                     | 43.33 (90)               | ND                                       | NS                                       | NS                                              | 37.74 (78)                           |
| CPG (306)              | 54.50 (68)                             | 52.61 (68)                       | 35.12 (66)                     | 32.88 (69)               | ND                                       | 32.94 (81)                               | 34.64 (50)                                      | 29.10 (60)                           |
